# Supplementary material for: Dinutuximab Beta Maintenance Therapy in Patients with High-Risk Neuroblastoma in First-Line and Refractory/Relapsed Settings—Real-World Data
Source: MDPI journal article supplement (doi:10.3390/jcm12165252), 2023-08-11
Supplement: s1 [file s1]

## Supplementary Materials

**Table S1.** Factors affecting the odds of relapse or death in patients who received dinutuximab beta maintenance therapy in the first-line setting

|                                                                           | Relapse           |                  | Death             |                  |
|---------------------------------------------------------------------------|-------------------|------------------|-------------------|------------------|
|                                                                           | OR (95% CI)       | <i>p</i> - value | OR (95% CI)       | <i>p</i> - value |
| Age ( $\geq 12$ versus $< 12$ months at diagnosis)                        | 5.23 (0.26–105.5) | 0.28             | 3.49 (0.17–71.25) | 0.42             |
| INSS disease stage (4 versus 3)                                           | 0.44 (0.05–3.54)  | 0.44             | 0.27 (0.03–2.27)  | 0.23             |
| MYCN amplification (yes versus no)                                        | 1.75 (0.40–7.73)  | 0.46             | 3.25 (0.54–19.3)  | 0.19             |
| Active disease prior to initiating dinutuximab beta (yes versus no)       | 1.75 (0.32–1.94)  | 0.52             | 3.00 (0.52–17.16) | 0.21             |
| Number of metastatic compartments involved at diagnosis ( $> 1$ versus 1) | 0.52 (0.09–2.93)  | 0.46             | 0.63 (0.09–4.22)  | 0.63             |

CI, confidence interval; INSS, International Neuroblastoma Staging System; OR, odds ratio. Univariate analysis with logistic regression ( $p < 0.05$  considered statistically significant).

**Table S2.** Factors affecting the odds of relapse or death in patients who received dinutuximab beta maintenance therapy in the relapsed/refractory setting

|                                                                     | Relapse           |                  | Death             |                  |
|---------------------------------------------------------------------|-------------------|------------------|-------------------|------------------|
|                                                                     | OR (95% CI)       | <i>p</i> - value | OR (95% CI)       | <i>p</i> - value |
| Age ( $\geq 12$ versus $< 12$ months at diagnosis)                  | 4.26 (0.19–97.48) | 0.36             | 4.26 (0.19–97.48) | 0.36             |
| INSS disease stage (4 versus 3)                                     | 0.25 (0.01–5.26)  | 0.37             | 0.15 (0.01–3.58)  | 0.24             |
| MYCN amplification (yes versus no)                                  | 0.30 (0.01–7.17)  | 0.46             | 0.66 (0.02–17.18) | 0.80             |
| Active disease prior to initiating dinutuximab beta (yes versus no) | 0.86 (0.09–8.07)  | 0.89             | 2.00 (0.15–27.4)  | 0.60             |

CI, confidence interval; INSS, International Neuroblastoma Staging System; OR, odds ratio. Univariate analysis with logistic regression ( $p < 0.05$  considered statistically significant).

**Table S3.** Pain during dinutuximab beta therapy, rated on a 10-point (0 [no pain] to 10 [worst pain imaginable];  $n = 54$ )

|                    | <b>Dinutuximab beta cycle</b> |                |          |          |          |
|--------------------|-------------------------------|----------------|----------|----------|----------|
| <b>Pain rating</b> | <b>1</b>                      | <b>2</b>       | <b>3</b> | <b>4</b> | <b>5</b> |
| <b>1</b>           | 0                             | 1              | 0        | 1        | 0        |
| <b>2</b>           | 2                             | 3              | 1        | 1        | 0        |
| <b>3</b>           | 5                             | 2              | 0        | 0        | 0        |
| <b>4</b>           | 1                             | 0              | 0        | 0        | 0        |
| <b>5</b>           | 3                             | 0              | 0        | 0        | 0        |
| <b>6</b>           | 0                             | 0              | 0        | 0        | 0        |
| <b>7</b>           | 2                             | 0              | 0        | 0        | 0        |
| <b>8</b>           | 2                             | 0              | 0        | 0        | 0        |
| <b>9</b>           | 0                             | 0              | 0        | 0        | 0        |
| <b>10</b>          | 0                             | 1 <sup>a</sup> | 0        | 0        | 0        |

Data present number of patients. <sup>a</sup> Patient had progressive disease and compression of the spinal cord.
